# Supplementary material for: Effects of night-time warming on temperate ectotherm reproduction: potential fitness benefits of climate change for side-blotched lizards
Source: Oxford University Press journal article supplement (doi:10.1242/jeb065359), 2012-03-07
Supplement: jeb065359figs1-s2.pdf [file jeb065359figs1-s2.pdf]

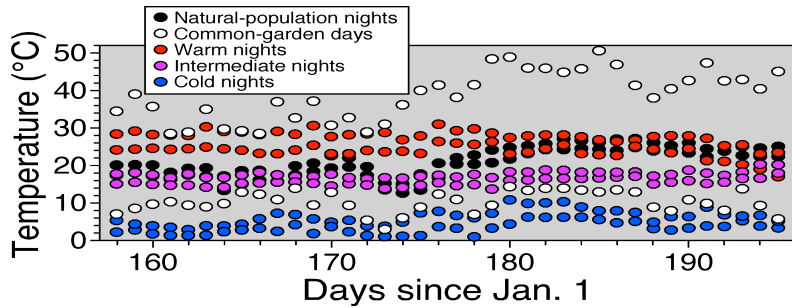

Supplemental Figure 1: temperature data from 2009 pilot experiment to determine natural nighttime temperature variation in rock crevices (solid symbols). Other data are from pilot trials using warm, intermediate, and cold incubators to alter nighttime temperature of lizards.

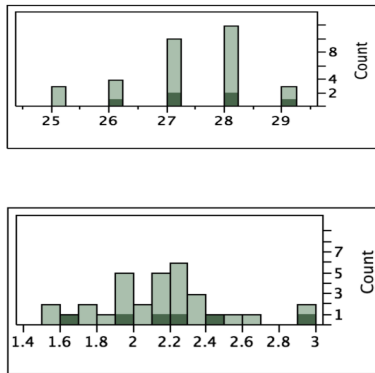

Supplemental Figure 2: Histograms showing stage at oviposition (top) and embryo length at oviposition (bottom).
